# Supplementary material for: Resonance-assisted amide protonation in dutasteride hydrochloride salt
Source: Royal Society of Chemistry journal article supplement (doi:10.1039/c2ce06421a), 2012-01-01
Supplement: c2ce06421a.pdf [file c2ce06421a.pdf]

**Table S1.** Amide salts from CSD. 1-46 are O-protonated; 47-50 are N-protonated. SHB indicates shortest hydrogen bond in the crystal.

| No | REFCODE  | C=O /Å | C=N /Å | O(N)-H/ /Å | SHB/ Å |
|----|----------|--------|--------|------------|--------|
| 1  | ACAMBR02 | 1.268  | 1.303  | --         | 2.439  |
| 2  | ACAMCL   | 1.265  | 1.305  | 1.225      | 2.450  |
| 3  | AFEGAT   | 1.272  | 1.302  | ---        | 2.446  |
| 4  | BOPDUF   | 1.283  | 1.309  | ---        | 2.434  |
| 5  | BOZGAY   | 1.268  | 1.307  | ---        | 2.435  |
|    |          | 1.269  | 1.303  | ---        | 2.423  |
| 6  | BZAMTI01 | 1.254  | 1.311  | ---        | 2.422  |
|    |          | 1.271  | 1.301  | ---        | 2.422  |
|    |          | 1.274  | 1.298  | ---        | 2.407  |
| 7  | BIFKEG   | 1.297  | 1.306  | 0.965      | 2.481  |
| 9  | BIFKIK   | 1.299  | 1.300  | 0.873      | 2.534  |
| 10 | BADCIS10 | 1.277  | 1.328  | ---        | 2.424  |
|    |          | 1.291  | 1.313  | ---        | 2.442  |
| 11 | CAPNIC   | 1.275  | 1.302  | ---        | 2.432  |
| 12 | CAPRLC   | 1.299  | 1.293  | 1.060      | 2.862  |
|    |          | 1.303  | 1.295  | 1.112      | 2.879  |
| 13 | CUGMOG   | 1.302  | 1.301  | 0.776      | 2.636  |
|    |          | 1.293  | 1.302  | 0.850      | 2.621  |
| 14 | CRBAMP06 | 1.295  | 1.323  | 1.176      | 2.420  |
| 15 | DAHRAF   | 1.275  | 1.319  | 1.116      | 2.420  |
|    |          | 1.274  | 1.324  | 1.317      | 2.420  |
| 16 | ENANLC   | 1.307  | 1.294  | 0.958      | 2.922  |
| 17 | FAJHUT   | 1.287  | 1.237  | ---        | 2.448  |
|    |          | 1.260  | 1.297  | ---        | 2.448  |
| 18 | FUVMUE   | 1.308  | 1.295  | 0.886      | 2.922  |
| 19 | FAMXIA   | 1.268  | 1.302  | ---        | 2.430  |
|    |          | 1.271  | 1.307  | ---        | 2.430  |
| 20 | HEKYAX   | 1.298  | 1.287  | 0.798      | 2.889  |
| 21 | HIRLIE   | 1.283  | 1.316  | ---        | 2.448  |
| 22 | JJRUP    | 1.268  | 1.313  | 1.212      | 2.424  |
| 23 | MACMHC   | 1.304  | 1.290  | 0.915      | 2.869  |
| 24 | MACMNO   | 1.287  | 1.292  | 1.116      | 2.566  |
| 25 | MIJTAB   | 1.270  | 1.330  | 1.169      | 2.453  |
|    |          | 1.272  | 1.308  | ---        | 2.453  |
| 26 | POCKOH   | 1.250  | 1.341  | ---        | 2.438  |
|    |          | 1.269  | 1.346  | ---        | 2.438  |
| 27 | PHACHI10 | 1.254  | 1.303  | ---        | 2.464  |
| 28 | PELAHC   | 1.275  | 1.305  | ---        | 2.432  |
| 29 | SATBAR   | 1.279  | 1.310  | 0..830     | 2.494  |

|    |                               |                |                |                |                |
|----|-------------------------------|----------------|----------------|----------------|----------------|
| 30 | SUCABT                        | 1.255<br>1.263 | 1.326<br>1.310 | ---<br>---     | 2.451<br>2.451 |
| 31 | SOYQED                        | 1.294          | 1.292          | 0.981          | 2.463          |
| 32 | UFAKUH                        | 1.308          | 1.312          | 0.862          | 2.577          |
| 33 | UFALAO                        | 1.303<br>1.319 | 1.323<br>1.317 | 0.787<br>0.797 | 2.557<br>2.568 |
| 34 | UREANT                        | 1.303          | 1.297          | 0.988          | 2.597          |
| 35 | VAYLEM                        | 1.302          | 1.307          | 0.825          | 2.561          |
| 36 | VAYLAI                        | 1.279<br>1.255 | 1.298<br>1.319 | 0.980<br>---   | 2.495<br>2.495 |
| 37 | VOPXOO                        | 1.283          | 1.301          | 0.814          | 2.530          |
| 38 | VOPXUU                        | 1.282          | 1.302          | 0.840          | 2.577          |
| 39 | VOPYEF                        | 1.271          | 1.316          | 0.830          | 2.413          |
| 40 | VOPYIJ                        | 1.291          | 1.298          | 0.861          | 2.522          |
| 41 | VOPYOP                        | 1.325          | 1.319          | 0.745          | 2.642          |
| 42 | VOPZIK                        | 1.293          | 1.301          | 0.855          | 2.572          |
| 43 | VOPZOQ                        | 1.290          | 1.290          | 0.898          | 2.567          |
| 44 | VOCPUY                        | 1.287          | 1.307          | 1.177          | 2.551          |
| 45 | XIZQAY                        | 1.272<br>1.282 | 1.313<br>1.310 | 1.220<br>---   | 2.440<br>2.440 |
| 46 | Dutasteride salt <sup>a</sup> | 1.277          | 1.291          | 0.833          | 2.411          |
| 47 | NEKPAV                        | 1.168<br>1.192 | 1.483<br>1.524 | 0.931<br>0.931 | 2.789<br>2.793 |
| 48 | ja101690u-002 <sup>b</sup>    | 1.201          | 1.492          | 0.931          | 2.721          |
| 49 | ja101690u-003 <sup>b</sup>    | 1.198          | 1.490          | 0.863          | 2.684          |
| 50 | ja101690u-004 <sup>b</sup>    | 1.192          | 1.502          | 0.892          | 2.682          |

<sup>a</sup>present study; <sup>b</sup>reference 10c in the main paper.

### O-protonation of amides

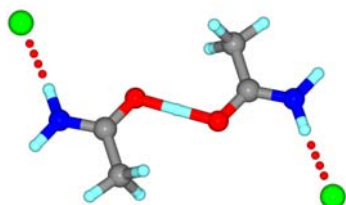

ACAMCL01

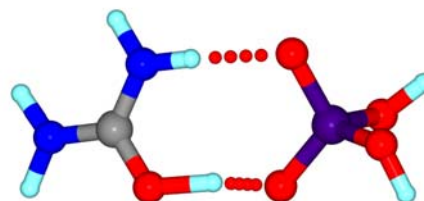

CRBAMP06

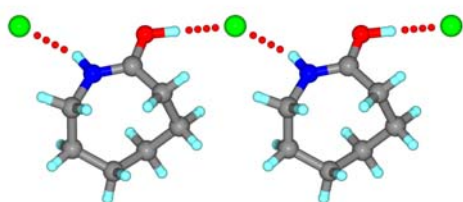

ENANLC

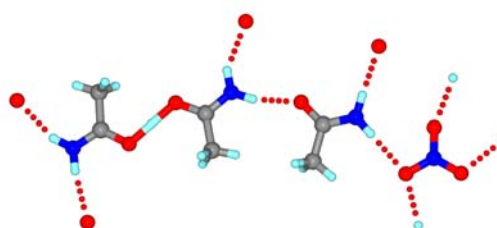

FAMXIA

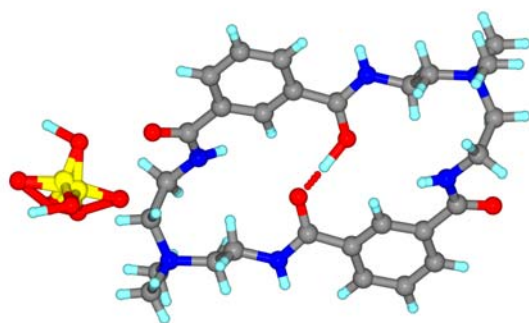

MIJTAB

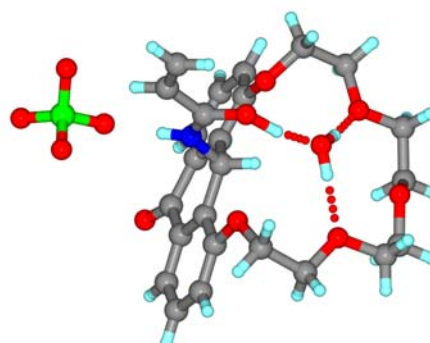

VOPYEF

### N-Protonation of amides

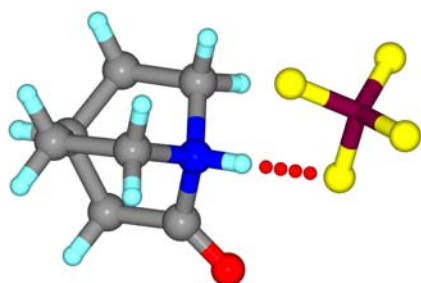

NEKPAV

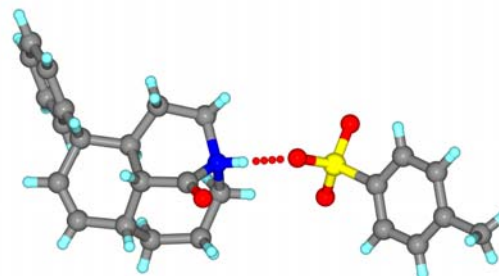

ja101690u-002

**Figure S1.** Selected literature examples of amide salts.

**Complete structural refinement details:** Preliminary lattice parameters and orientation matrices were obtained from four sets of frames. Unit cell dimensions were determined using 9822 reflections in the range of  $2.27 < \theta < 20.57^\circ$  for hemihydrate and 3522 reflections in the range of  $2.33 < \theta < 24.24^\circ$  for dutasteride salt. Integration and scaling of intensity data were accomplished using SAINT program. The structure was solved by direct methods using SHELXS97 and refinement was carried out by full-matrix least-squares technique using SHELXL97. Anisotropic displacement parameters were included for all non-hydrogen atoms. N-bound H atoms of the dutasteride molecules and H atoms of water molecules of hemihydrate and salt were located in difference Fourier maps and their positions and isotropic displacement parameters were refined. Distance restraints were applied to N-H & O-H of hemihydrate and water O-H of salt, with a set values of 0.84(2) Å for N-H and 0.89(2) Å for O-H, respectively. All other H atoms were positioned geometrically and treated as riding on their parent C atoms [C-H = 0.93-0.98 Å and  $U_{iso}(H) = 1.5U_{eq}(C)$  for methyl H or  $1.2U_{eq}(c)$  for other H atoms]. The methyl groups were allowed to rotate but not to tip. The fluorine atoms (F4A-F6A, F1B-F3B & F4B-F6B) of the trifluoromethyl (CF<sub>3</sub>) groups of hemihydrate were disordered over two sites, with occupancies of 0.502(9) and 0.498(9). Similarly, the fluorine atoms (F4-F6) of CF<sub>3</sub> group of salt were also disordered over two sites, with occupancies of 0.537(11) and 0.463(9). The anisotropic displacement parameters of the major and minor components were restrained to be similar with SIMU and SAME instructions (SHELXL97, Sheldrick, 2008). The C-F distances of the disordered trifluoromethyl (CF<sub>3</sub>) groups were restrained to be 1.33(2) Å and the F...F distances to be 2.10(2) Å for hemihydrate. The ethanol solvate in the salt was disordered over two sites (C30/C31/O3 & C301/C311/O31) with site occupancies of 0.727(10) and 0.273(10). Distance restraints were applied to C-C and C-O of the ethanol solvate, with a set value of 1.55(2) and 1.44(2) Å, respectively. The O-bound H atom of ethanol solvate was located in difference Fourier maps and found to be shared by disordered atoms O3 and O31. Their positions and isotropic displacement parameters were refined. **References:** Bruker, SAINT Version 6.28a and SMART version 5.625, Bruker AXS Inc, Madison, Wisconsin, USA, 2000. (e) G. M. Sheldrick, SHELXS97 and SHELXL97, 1997, University of Göttingen, Germany.
